# Supplementary material
Source: PubMed Central journal article supplement (PMC7549723)
Supplement: KSGT_A_1378157_SM5046.pdf [file KSGT_A_1378157_SM5046.pdf]

**Table S1: Strains used in the study.**

| STRAIN | RELEVANT GENEOTYPE                                                                                                       | REFERENCE  |
|--------|--------------------------------------------------------------------------------------------------------------------------|------------|
| BWP17  | <i>ura3Δ::λimm434/ura3Δ::λimm434</i><br><i>his1Δ::hisG/his1Δ::his</i><br><i>arg4::hisG/arg4Δ::hisG</i>                   | [40]       |
| PY82   | <i>ura3Δ::λ imm434/ura3Δ::λ imm434</i><br><i>his1::hisG/HIS1::his1::hisG</i><br><i>arg4::hisG/URA3::ARG4::arg4::hisG</i> | [38]       |
| PY1984 | Same as PY173 with <i>arf2Δ::HIS1/</i><br><i>arf2::URA3pTetoffARF2</i>                                                   | [18]       |
| PY2015 | Same as PY1984 with <i>RP10::ARG4</i>                                                                                    | [18]       |
| PY2533 | Same as BWP17 with <i>arl1Δ::HIS1/</i><br><i>arl1Δ::URA3</i>                                                             | [18]       |
| PY2538 | Same as PY2533 with <i>RP10::ARG4</i>                                                                                    | [18]       |
| PY2522 | Same as PY173 with <i>SEC4/URA3-</i><br><i>GFPSEC4::SEC4</i>                                                             | [8]        |
| PY2596 | Same as BWP17 but <i>arl1Δ::HIS1/</i><br><i>ARL1::GFP-URA3</i>                                                           | This study |
| PY2784 | Same as BWP17 with <i>ypt6Δ::HIS1/</i><br><i>ypt6Δ::URA3</i>                                                             | This study |
| PY2840 | Same as PY2784 with <i>RP10::ARG4</i>                                                                                    | This study |
| PY2890 | Same as BWP17 with <i>RP10:: ARG4</i><br><i>pADH1YPT6</i>                                                                | This study |
| PY2893 | Same as PY2533 with <i>RP10:: ARG4</i><br><i>pADH1YPT6</i>                                                               | This study |
| PY2894 | Same as PY2784 with <i>RP10:: ARG4</i><br><i>pADH1YPT6</i>                                                               | This study |
| PY2898 | Same as PY2533 with <i>RP10:: ARG4</i><br><i>pADH1ARL1</i>                                                               | This study |
| PY2900 | Same as PY2784 with <i>RP10:: ARG4</i><br><i>pADH1ARL1</i>                                                               | This study |
| PY3279 | Same as BWP17 with <i>MLC1/MLC1::</i><br><i>MLC1-GFPγ-ARG4</i>                                                           | This study |
| PY3280 | Same as PY2533 with <i>MLC1/MLC1::</i><br><i>MLC1-GFPγ-ARG4</i>                                                          | This study |
| PY3474 | Same as PY2784 with <i>RP10::ARG4-</i><br><i>pYPT6mChYPT6</i>                                                            | This study |
| PY4222 | Same as BWP17 with <i>arl1Δ::HIS1/</i><br><i>arl1Δ::SAT1</i>                                                             | This study |
| PY4225 | Same as PY4222 with <i>SEC4/ URA3-</i><br><i>GFPSEC4::SEC4</i>                                                           | This study |
| PY4494 | Same as PY2533 with <i>RP10:: ARG4</i><br><i>pADH1YPT6[Q71L]</i>                                                         | This study |
| PY4496 | Same as PY2533 with <i>RP10:: ARG4</i><br><i>pADH1YPT6[T25N]</i>                                                         | This study |

|        |                                                             |            |
|--------|-------------------------------------------------------------|------------|
| PY4497 | Same as PY1984 with <i>RP10:: ARG4</i><br><i>pADH1YPT6</i>  | This study |
| PY4504 | Same as 2596 with <i>RP10::ARG4-</i><br><i>pYPT6mChYPT6</i> | This study |
| PY4505 | Same as PY4225 with <i>RP10:: ARG4</i><br><i>pADH1ARL1</i>  | This study |
| PY4506 | Same as PY4225 with <i>RP10:: ARG4</i><br><i>pADH1YPT6</i>  | This study |
